# Supplementary material for: Synthesis of butadiene/isoprene–styrene di-block copolymer with high cis-1,4 unit content based on a neodymium phosphate ester
Source: Royal Society of Chemistry journal article supplement (doi:10.1039/d1ra06923c), 2021-01-01
Supplement: d1ra06923c1.pdf [file d1ra06923c1.pdf]

## Supporting Information

### Synthesis of butadiene/isoprene-styrene di-block copolymer with high *cis*-1,4 unit content based on a phosphate Ester neodymium

Jie Liu,<sup>a</sup> Nan Zheng,<sup>a#,\*</sup> Xin Min,<sup>b,\*</sup> Junhai Liu,<sup>a</sup> Zhizhou Li,<sup>a</sup> Xiaohui Ji<sup>a</sup>

<sup>a</sup>Shaanxi Key Laboratory of Catalysis, College of Chemical & Environment Science, Shaanxi University of Technology, Hanzhong, China. <sup>b</sup>College of Chemistry and Environmental Engineering, Jiujiang University, Jiujiang, China.

#### 1. The calculation method of micro-structure content in the copolymer PB-*b*-PS

The stereo-structures of polybutadiene (PB) segment in the copolymer PB-*b*-PS prepared by coordination polymerization include *cis*-1,4-PB, *trans*-1,4-PB and 1,2-PB. According to literature [1-5], the specific micro-structure calculation methods of PB-*b*-PS are shown in eq(1)-(6).

$$C_{PB}\% = \frac{(I_2 + I_1)/2}{I_3/5 + (I_2 + I_1)/2} \times 100 \quad (1)$$

$$C_{PS}\% = \frac{I_3/5}{I_3/5 + (I_2 + I_1)/2} \times 100 \quad (2)$$

$$C_{1,4-PB}\% = \frac{I_2}{I_1 + I_2} \times 100 \quad (3)$$

$$C_{1,2-PB}\% = \frac{I_1}{I_1 + I_2} \times 100 \quad (4)$$

$C_{PB}$  and  $C_{PS}$  are the segment content of polybutadiene (PB) and polystyrene (PS) in the block copolymers PB-*b*-PS, respectively;  $C_{1,4-PB}$  and  $C_{1,2-PB}$  are the unit content of 1,4-PB, 1,2-PB in the PB segment;  $I_1$  is the integration of the resonance  $\delta = 5.05$  ppm (two vinyl protons of the 1,2-Bd unit),  $I_2$  is the integration of the resonance  $\delta = 5.40$  ppm (two vinyl protons of the 1,4-Bd unit), and  $I_3$  is the integration of the resonance  $\delta = 6.25-7.25$  ppm (five phenyl protons of St segment), respectively, in the <sup>1</sup>H NMR spectrum of the PB-*b*-PS copolymer.

$$C_{cis-1,4-PB}\% = C_{1,4-PB} \times \frac{I_4}{I_4 + I_5} \times 100 \quad (5)$$

$$C_{trans-1,4-PB}\% = C_{1,4-PB} \times \frac{I_5}{I_4 + I_5} \times 100 \quad (6)$$

As shown in eq(5)-(6),  $C_{1,4-PB}$ ,  $C_{cis-1,4-PB}$  and  $C_{trans-1,4-PB}$  are the unit content of 1,4-PB, *cis*-1,4-PB and *trans*-1,4-PB in the PB segment of block copolymer PB-*b*-PS, respectively;  $I_4$  is the integration of the resonance  $\delta = 27.5$  ppm and  $I_5$  is the integration of the resonance  $\delta = 32.6$  ppm, respectively, in the  $^{13}\text{C}$  NMR spectrum of the PB-*b*-PS copolymer.

A detailed calculation method of PB-*b*-PS sample (**Entry 2, Table 3**) prepared based on catalyst system  $\text{Nd}(\text{P}_{507})_3/\text{Al}(i\text{-Bu})_3/\text{CHCl}_3/\text{PPh}_3$  was described as a typical example. The corresponding integral data are shown in the **Fig. S1** and **Fig. S2**, the value of  $I_1, I_2, I_3, I_4$  and  $I_5$  are 1, 94.68, 55.06, 136.30 and 1. According to eq (1)-(6), it can be determined that the styrene segment content is 18.6%, and the *cis*-1,4 unit content is 98.3%, and the specific results are shown in **Table 3** and **Table 1**.

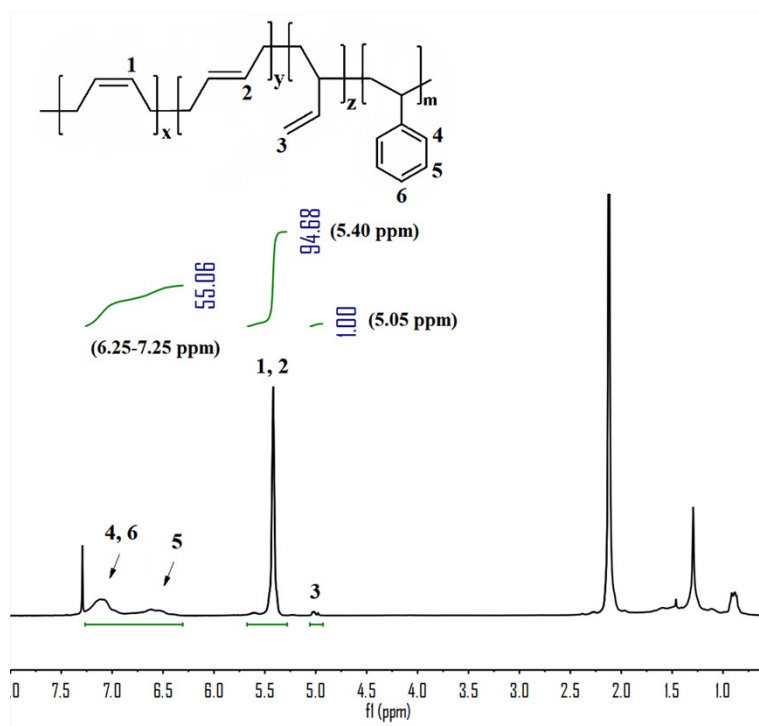

**Fig. S1** Integral data in  $^1\text{H}$  NMR spectra of the PB-*b*-PS (Entry 2, Table 3)

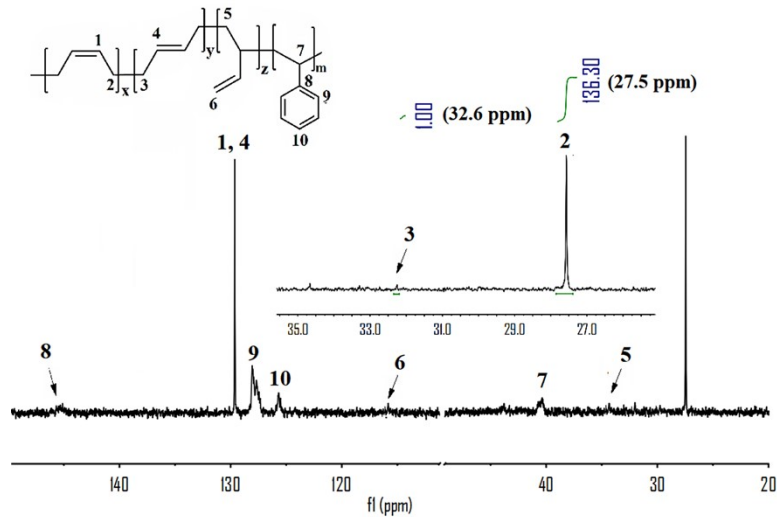

Fig. S2 Integral data in  $^{13}\text{C}$  NMR spectra of the PB-*b*-PS (Entry 2, Table 3)

## 2. The calculation method of micro-structure content in the copolymer PI-*b*-PS

The stereo-structures of polyisoprene (PI) prepared by coordination polymerization are mainly *cis*-1,4-PI, *trans*-1,4-PI and 3,4-PI. According to literature [1-3], the specific micro-structure calculation methods of PI-*b*-PS are as shown in eq(7)-(10).

$$C_{PI}\% = \frac{(2I_6 + I_7)/2}{I_8/5 + (2I_6 + I_7)/2} \times 100 \quad (7)$$

$$C_{PS}\% = \frac{I_8/5}{I_8/5 + (2I_6 + I_7)/2} \times 100 \quad (8)$$

$$C_{1,4-PI}\% = \frac{2I_7}{I_6 + 2I_7} \times 100 \quad (9)$$

$$C_{3,4-PI}\% = \frac{I_6}{I_6 + 2I_7} \times 100 \quad (10)$$

$C_{PI}$  and  $C_{PS}$  are the segment content of polyisoprene (PI) and polystyrene (PS) in the block copolymer PI-*b*-PS, respectively;  $C_{1,4-PI}$  and  $C_{3,4-PI}$  are the unit content of 1,4-PI, 3,4-PI in the Segment PB, respectively;  $I_6$  is the integration of the resonance  $\delta = 4.75$  ppm (two vinyl protons of the 3,4-PI unit),  $I_7$  is the integration of the resonance  $\delta = 5.20$  ppm (one vinyl protons of the 1,4-PI unit), and  $I_8$  is the integration of the resonance  $\delta = 6.25$ -7.25 ppm (five phenyl protons of St unit), respectively, in the  $^1\text{H}$

NMR spectrum of the PI-*b*-PS copolymer.

It can be seen from FT-IR spectrum of the PI-*b*-PS obtained via Nd(P<sub>507</sub>)<sub>3</sub>/Al(*i*-Bu)<sub>3</sub>/CHCl<sub>3</sub>/PPh<sub>3</sub> catalytic system in this experiment, there is no peak at 1150 cm<sup>-1</sup> and 1385 cm<sup>-1</sup>, which indicates that there is almost no *trans*-1,4 unit structure in the polyisoprene segment [1,6-7], as shown in **Fig. 7**. Furthermore, there is also no obvious peak at chemical shift 18.6 ppm, 40.0 ppm and 125.3 ppm in the <sup>13</sup>C NMR of the copolymer PI-*b*-PS (as shown in **Fig. S3**), which also shows that the content of *trans*-1,4-IP structure in the block copolymer is close to Zero [1]. Therefore, in the determination about the microstructure of PI segment in this article, *cis*-1,4 and 1,4- are approximately regarded as equal [1], as shown in **eq(11)**.

$$C_{cis-1,4-PI}\% = C_{1,4-PI}\% = \frac{2I_7}{I_6 + 2I_7} \times 100 \quad (11)$$

A detailed calculation method of PI-*b*-PS sample (**Entry 2, Table 5**) prepared based on catalyst system Nd(P<sub>507</sub>)<sub>3</sub>/Al(*i*-Bu)<sub>3</sub>/CHCl<sub>3</sub>/PPh<sub>3</sub> was described as a typical example. The corresponding integral data are shown in the **Fig. S4**, the value of I<sub>6</sub>, I<sub>7</sub> and I<sub>8</sub> are 1, 25.86 and 29.60. According to **eq (7)-(11)**, it can be concluded that the styrene segment content is 18.3%, and the *cis*-1,4 unit content is 98.1%, the specific results are shown in **Table 4** and **Table 5**.

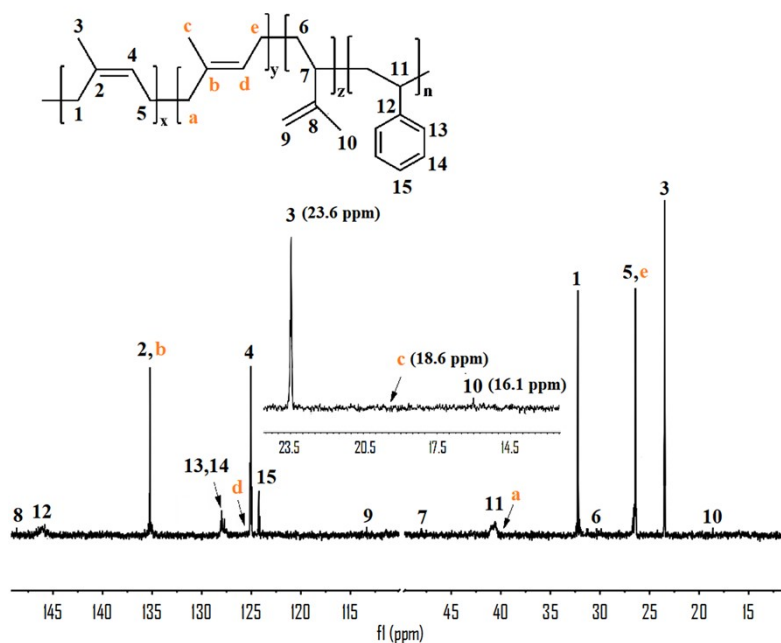

**Fig. S3** <sup>13</sup>C NMR spectra of the PI-*b*-PS (Entry 2, Table 5)

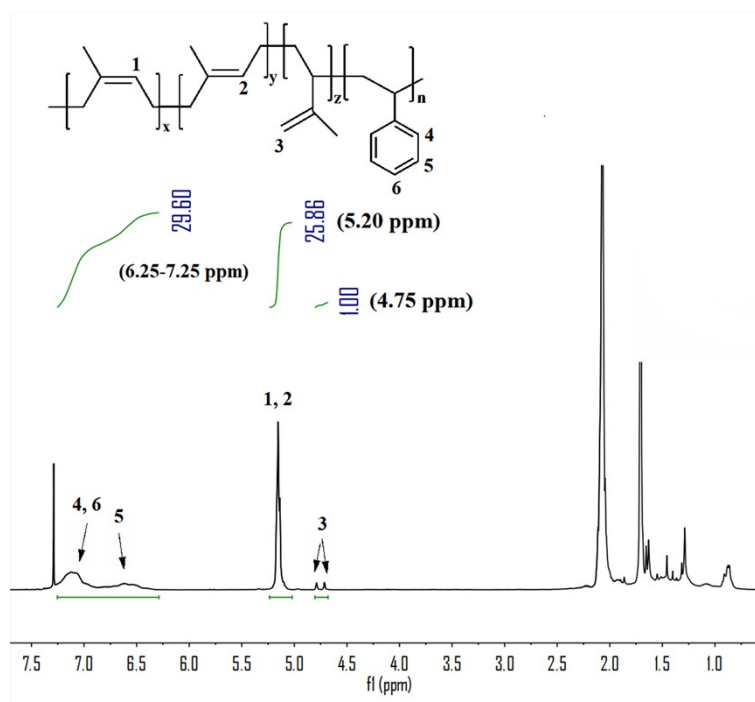

Fig. S4 Integral data in  $^1\text{H}$  NMR spectra of the PI-*b*-PS (Entry 2, Table 5)

## Reference

- [1] F. Guo, R. Meng, Y. Li and Z. M. Hou, *Polymer*, 2015, **76**, 159-167.
- [2] Z. B. Jian, S. J. Tang and D. M. Cui, *Macromolecules*, 2011, **44**, 7675–7681.
- [3] I. V. Vasilenko, H. Y. Yeong, M. Delgado, S. Ouardad, F. Peruch, B. Voit, F. Ganachaud and S. V. Kostjuket, *Angew. Chem. Int. Edi.*, 2015, **54**, 12728–12732.
- [4] H. T. Ban, T. Kase, M. Kawabe, A. Miyazawa and T. Shiono, *Macromolecules*, 2006, **39**, 171-176.
- [5] S. Bywater, Y. Firat and P. E. Black, *Journal of Polymer Science: Polymer Chemistry Edition*, 1984, **22**, 669.
- [6] L. Li, Q. Xu, B.B. Zhuang, C. H. Zhang, Y. R. Wang and Y. Li, Synthesis of Styrene/Isoprene/Butadiene Terpolymer in Styrene based on Rareearth Catalyst, *Polym. Eng. Sci.*, 2015, **31**, 1-6.
- [7] W. Li, Y. LI, Y.M. HU and Y. R. Wang, *Lubrication Science*, 2012, **24**, 188–197.
